# Supplementary material for: End-to-end edge detection on self-rectifying resistive memory array
Source: Royal Society of Chemistry journal article supplement (doi:10.1039/d4tc03155e), 2024-01-01
Supplement: d4tc03155e1.pdf [file d4tc03155e1.pdf]

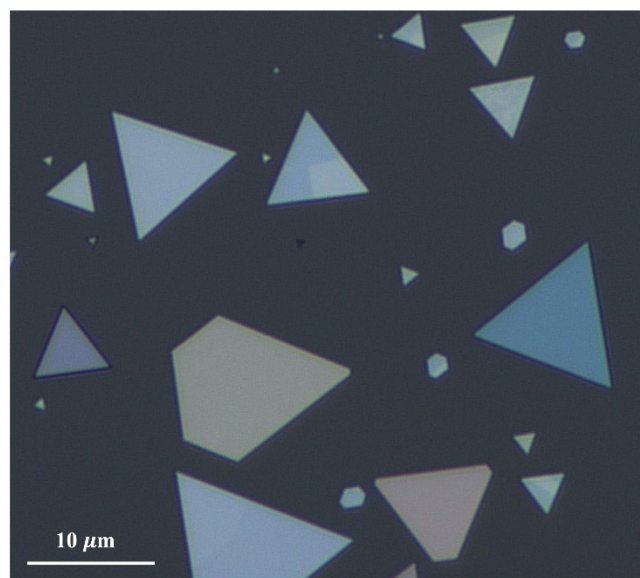

Fig. S1 The OM image of the  $\text{Cu}_2\text{Te}$  nanosheets.

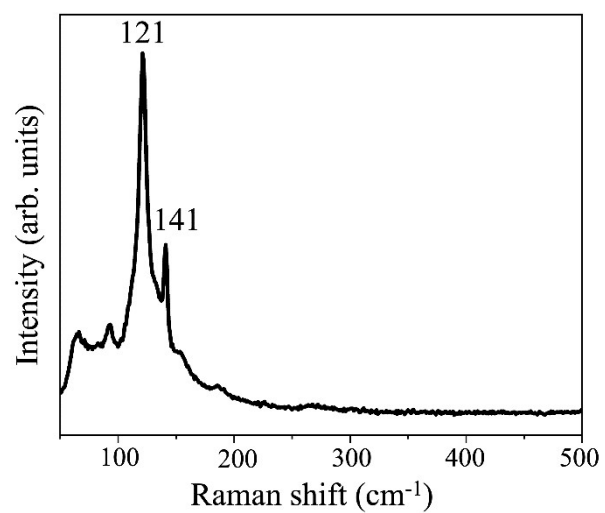

Fig. S2 The Raman spectra of  $\text{Cu}_2\text{Te}$  nanosheet.

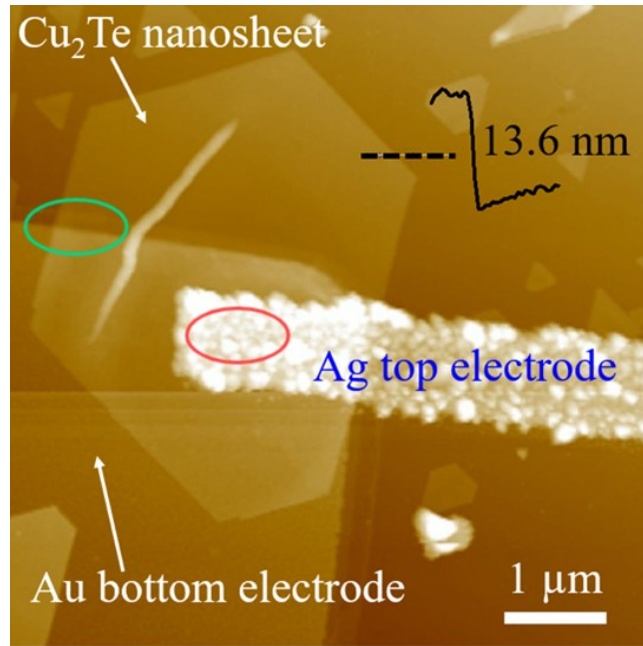

**Fig. S3** Typical AFM image of the Cu<sub>2</sub>Te vertical device with Au bottom electrode and Ag top electrode. Red oval: Ag actively participates in switching reactions of memristor, resulting in the observed particle size. Green oval: A dual-layer resist process involving MMA and PMMA was used in the preparation of the Au electrode, resulting in a distinct multilayer structure.

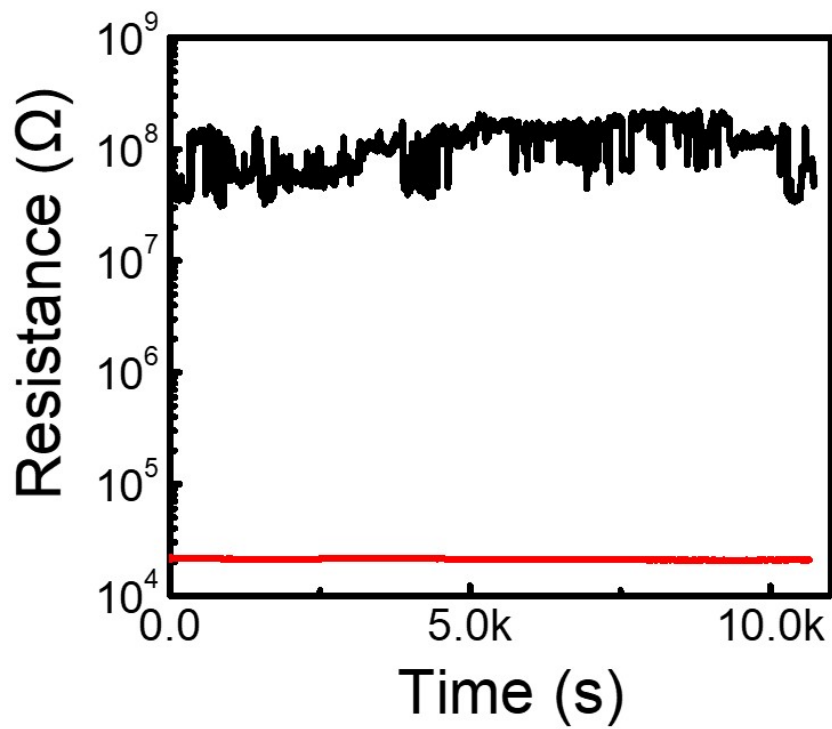

**Fig. S4** Typical retention performance of Cu<sub>2</sub>Te vertical device.

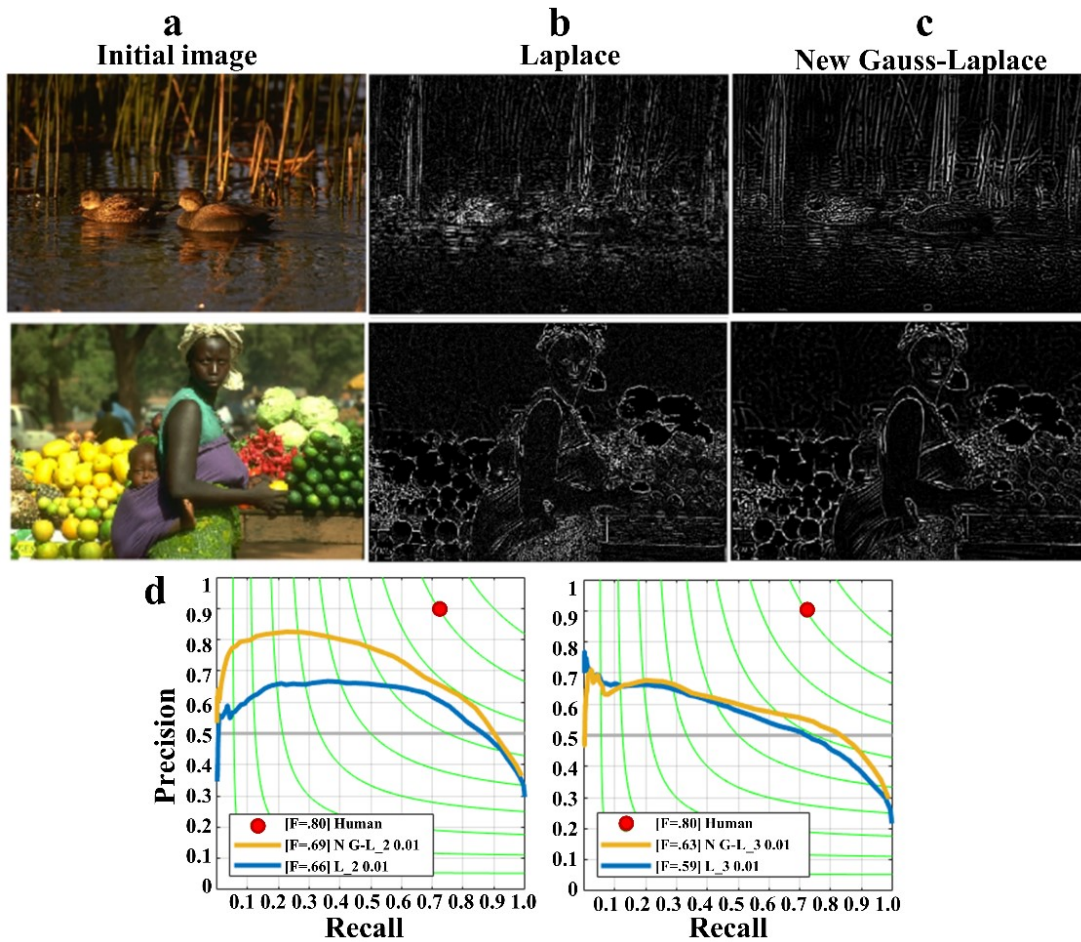

**Fig. S5** a The initial input images figures 2 and 3. b-c The edge detection results of input images figures 2 and 3 with noisy ( $\sigma=0.01$ ) are obtained by using the Laplace operator and the new Gauss-Laplace operator respectively. d The P-R curves are used to evaluate the edge detection results of two operators. N G-L denotes the new Gauss-Laplace operator and L denotes the Laplace operator. The number 2 and 3 represent the two images figures 2 and 3 in Figure S1a. The number 0.01 represents the standard deviation of noise  $\sigma$  (0.01).

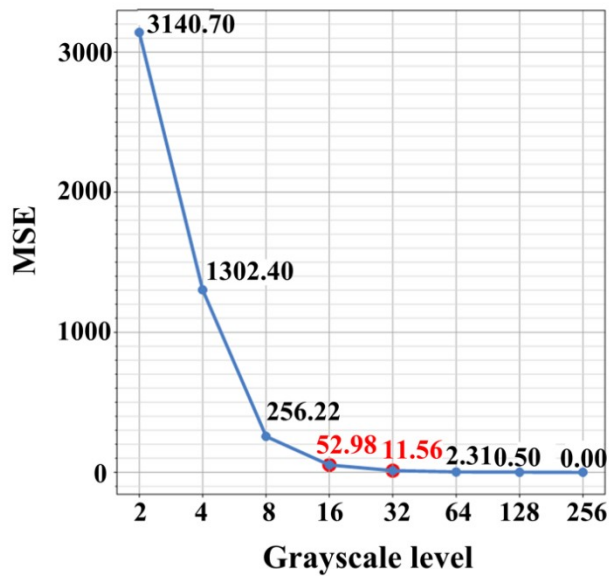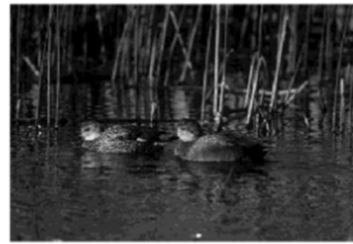

16 levels

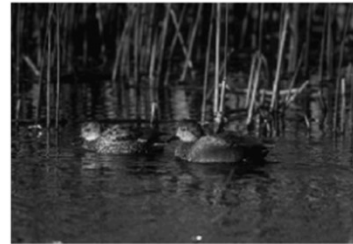

32 levels

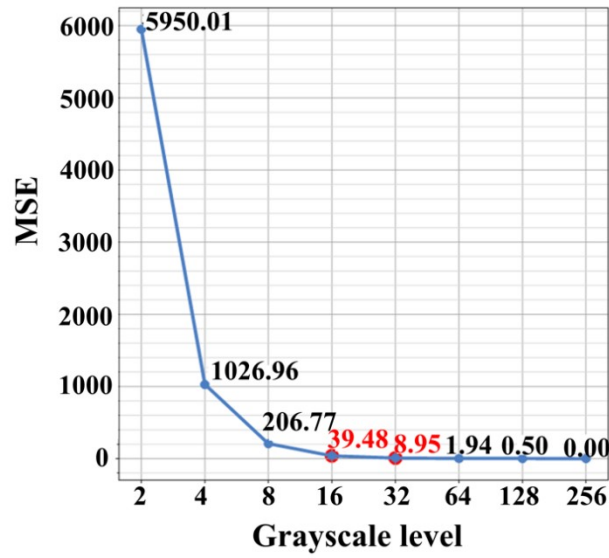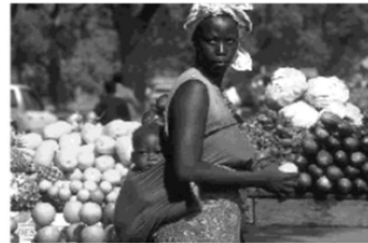

16 levels

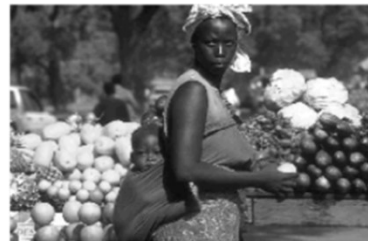

32 levels

**Fig. S6** The changes of MSE values when reducing grayscale levels of grayscale images figures 2 and 3 from 256 grayscale levels to 2 grayscale levels. In addition, the images' 16-grayscale-level and 32-grayscale-level counterpart are presented.
